# Supplementary material
Source: publisher figshare collection journal article supplement (https://tandf.figshare.com/articles/dataset/_/1577602)
Supplement: Supplementary file 12 [file 1]

Archive with 14 entries (14 files):
- iiht_a_938184_sm0001.pdf
- iiht_a_938184_sm0002.pdf
- iiht_a_938184_sm0003.pdf
- iiht_a_938184_sm0004.pdf
- iiht_a_938184_sm0005.pdf
- iiht_a_938184_sm0006.pdf
- iiht_a_938184_sm0007.pdf
- iiht_a_938184_sm0008.pdf
- iiht_a_938184_sm0009.pdf
- iiht_a_938184_sm0010.pdf
- iiht_a_938184_sm0011.pdf
- iiht_a_938184_sm0012.pdf
- iiht_a_938184_sm0013.pdf
- iiht_a_938184_sm0014.pdf
