# Supplementary material
Source: publisher figshare collection journal article supplement (https://tandf.figshare.com/articles/dataset/_/1577602)
Supplement: Supplementary file 12 [file 1 › iiht_a_938184_sm0013.pdf]

Warning: This form is not supported with the current version of Acrobat or Adobe Reader.  
Upgrade to the latest version for full support.
