# Supplementary material
Source: publisher figshare collection journal article supplement (https://tandf.figshare.com/articles/dataset/_/1577602)
Supplement: Supplementary file 12 [file 1 › iiht_a_938184_sm0014.pdf]

Supplemental Table 1. Analytical Methods

| Parameter                        | Column 1                   | Column 2                    |
|----------------------------------|----------------------------|-----------------------------|
| <b>Column</b>                    | Agilent HP-Wax             | Agilent DB-ALC1             |
| <b>Headspace</b>                 |                            |                             |
| Oven Temperature                 | 70°C                       | 70°C                        |
| Loop Temperature                 | 80°C                       | 80°C                        |
| Transfer Line Temperature        | 90°C                       | 90°C                        |
| Pressurization Time              | 0.20 min                   | 0.20 min                    |
| Loop Fill Time                   | 0.20 min                   | 0.20 min                    |
| Loop Volume                      | 1.0 mL                     | 1.0 mL                      |
| <b>GC Inlet Parameters</b>       |                            |                             |
| Inlet Mode:                      | Split                      | Split                       |
| Inlet Temperature                | 250°C                      | 250°C                       |
| Total (Helium) Flow Rate         | 4.1 ml/min (constant flow) | 11.5 ml/min (constant flow) |
| <b>GC Column Parameters</b>      |                            |                             |
| Dimensions (LxDxT)               | 30.0m x 250µm x 0.25µm     | 30.0m x 320µm x 1.8µm       |
| Oven Program                     | 40°C (isothermic)          | 40°C (isothermic)           |
| Avg Column Velocity              | 25 cm/sec                  | 69 cm/sec                   |
| Run Time                         | 10.0 min                   | 3.0 min                     |
| <b>Flame Ionization Detector</b> |                            |                             |
| Temperature                      | 300°C                      | 300°C                       |
| Hydrogen Flow                    | 30.0 mL/min                | 40.0 mL/min                 |
| Air Flow                         | 400.0 mL/min               | 450.0 mL/min                |

Supplemental Table 2. Blood Ethanol Concentrations (GD9-20, mg/dL)

**Blood Ethanol Concentrations (GD9-20, mg/dL)**

|       | GD9 | GD12 | GD16 | GD20 |
|-------|-----|------|------|------|
| Dam 1 | 148 | 191  | 138  | 191  |
| Dam 2 | 198 | 204  | 126  | 179  |
| Dam 3 | 103 | 138  | 127  | 167  |
| Dam 4 | 162 | 9    | 201  | 187  |

Supplemental Table 3a. Nose-Only Plethysmography Results.

| Nose-Only                                      | F (b/min)                           | Vt (mL/b)                            | Ve (mL/min)                             | TI (s)                              | TE (s)                           | PIF (mL/s)                           | PEF (mL/s)                            | RT (s)                             | PenH                              | Paus                                | TETI                                    |
|------------------------------------------------|-------------------------------------|--------------------------------------|-----------------------------------------|-------------------------------------|----------------------------------|--------------------------------------|---------------------------------------|------------------------------------|-----------------------------------|-------------------------------------|-----------------------------------------|
| 0ppm<br>Avg<br>(SD,<br>AUC)                    | 164<br>(39.7,<br>912.1 )            | 2.78<br>(0.82,<br>16.06)             | 450<br>(175.9,<br>150911 )              | 0.21<br>(0.06,<br>1.29)             | 0.20<br>(0.06,<br>1.27)          | 23.6<br>(7.28,<br>131.57)            | 20.31<br>(8.62,<br>107.36)            | 0.14<br>(0.04,<br>0.91)            | 0.59<br>(0.15,<br>3.44)           | 0.68<br>(0.13,<br>4.10)             | 77.80<br>(12.4,<br>441.44)              |
| 5,000ppm<br>Avg<br>(SD,<br>AUC,<br>% change)   | 170*<br>(26.4,<br>996.3,<br>3.66)   | 2.41*<br>(0.1,<br>14.33,<br>-13.31)  | 406.0<br>(80.2,<br>140467 ,<br>- 9.78)  | 0.17*<br>(0.02,<br>1.01,<br>-19.05) | 0.21<br>(0.06,<br>1.28,<br>5.0)  | 19.8*<br>(3.69,<br>118.5,<br>-16.10) | 18.67 *<br>(3.76,<br>106.5,<br>-8.08) | 0.13<br>(0.04,<br>0.81, -<br>7.14) | 0.62<br>(0.14,<br>3.41,<br>5.09)  | 0.64<br>(0.13,<br>3.75, -<br>5.88)  | 86.2*<br>(15.34,<br>487.08,<br>10.80)   |
| 10,000 ppm<br>Avg<br>(SD,<br>AUC,<br>% change) | 166<br>(23.1,<br>984.8,<br>1.22)    | 2.50*<br>(0.32,<br>14.58,<br>-10.07) | 415.0<br>(81.6,<br>140204 ,<br>- 7.78)  | 0.17*<br>(0.02,<br>1.01,<br>-19.05) | 0.20<br>(0.03,<br>1.21,<br>0.0)  | 19.2*<br>(4.25,<br>113.4,<br>-18.64) | 20.06<br>(4.05,<br>113.90,<br>-1.23)  | 0.13<br>(0.02,<br>0.79, -<br>7.14) | 0.63<br>(0.21,<br>3.51,<br>6.78)  | 0.56<br>(0.09,<br>3.38, -<br>17.65) | 95.93*<br>(24.94,<br>539.58,<br>23.30)  |
| 21,000 ppm<br>Avg<br>(SD,<br>AUC,<br>% change) | 157*<br>(31.9,<br>891.7, -<br>4.27) | 2.3*<br>(0.5,<br>13.77,<br>- 17.266) | 351.0*<br>(80.3,<br>118701 ,<br>- 22.0) | 0.20<br>(0.05,<br>1.23,<br>-4.76)   | 0.21*<br>(0.05,<br>1.34,<br>5.0) | 16.6*<br>(3.95,<br>95.16,<br>-29.66) | 17.86*<br>(4.67,<br>99.30,<br>-12.06) | 0.13<br>(0.04,<br>0.85, -<br>7.14) | 0.67<br>(0.22,<br>3.94),<br>13.56 | 0.60<br>(0.13,<br>3.69, -<br>11.76) | 100.56<br>* (28.6,<br>568.48,<br>29.25) |

Supplemental Table 3b. Whole-Body Plethysmography Results

| Whole-Body                                 | F<br>(b/min)                            | Vt<br>(mL/b)                       | Ve<br>(mL/min)                        | TI<br>(s)                          | TE (s)                              | PIF<br>(mL/s)                      | PEF<br>(mL/s)                       | RT<br>(s)                          | Pen<br>H                          | Pau<br>s                           | TETI                                |
|--------------------------------------------|-----------------------------------------|------------------------------------|---------------------------------------|------------------------------------|-------------------------------------|------------------------------------|-------------------------------------|------------------------------------|-----------------------------------|------------------------------------|-------------------------------------|
| 0ppm<br>Avg<br>(SD,<br>AUC)                | 213<br>(101.8,<br>1070.0)               | 1.32<br>(0.16,<br>7.98)            | 247<br>(104.1,<br>84526.8)            | 0.17<br>0<br>(0.06,<br>1.13)       | 0.21<br>(0.06,<br>1.37)             | 16.0<br>(6.6,<br>81.10)            | 13.5<br>(5.1,<br>70.74)             | 0.12<br>(0.03,<br>0.79)            | 0.77<br>(0.14,<br>4.83)           | 0.80<br>(0.07,<br>4.89)            | 81.3<br>(9.9,<br>499.75)            |
| 5,000ppm Avg<br>(SD,<br>AUC, %<br>change)  | 179*<br>(66.3,<br>989.59,<br>-15.96)    | 1.47*<br>(0.32,<br>9.91,<br>11.36) | 255<br>(50.0,<br>87630.5,<br>3.24)    | 0.179*<br>(0.05,<br>1.17,<br>5.29) | 0.216<br>(0.04,<br>1.34,<br>2.86)   | 15.7*<br>(2.9,<br>89.23,<br>-1.88) | 14.0<br>(2.9,<br>83.15,<br>3.70)    | 0.13<br>(0.02,<br>0.79,<br>3.28)   | 0.78<br>(0.09,<br>4.81,<br>1.30)  | 0.79<br>(0.07,<br>4.68,<br>-1.25)  | 84.6*<br>(12.1,<br>534.64,<br>4.06) |
| 10,000ppm Avg<br>(SD,<br>AUC, %<br>change) | 203<br>(76.4,<br>1072.3,<br>1, -4.69)   | 1.35<br>(0.24,<br>8.88,<br>2.27)   | 257*<br>(47.0,<br>88239.6,<br>4.05)   | 0.163<br>(0.04,<br>1.06,<br>-4.12) | 0.197*<br>(0.04,<br>1.20,<br>-6.19) | 15.6*<br>(3.5,<br>88.30,<br>-2.5)  | 13.9<br>(2.7,<br>81.65,<br>2.96)    | 0.11*<br>(0.02,<br>0.70,<br>-6.56) | 0.75*<br>(0.1,<br>4.65,<br>-2.60) | 0.77*<br>(0.05,<br>4.60,<br>-3.75) | 85.1*<br>(11.9,<br>536.83,<br>4.67) |
| 21,000ppm Avg<br>(SD,<br>AUC, %<br>change) | 185*<br>(59.3,<br>1000.6,<br>5, -13.14) | 1.22*<br>(0.12,<br>7.20,<br>-7.58) | 201*<br>(76.9,<br>68615.0,<br>-18.62) | 0.176<br>(0.04,<br>1.13,<br>3.53)  | 0.23<br>(0.04,<br>1.14,<br>9.52)    | 13.2*<br>(4.6,<br>70.37,<br>-17.5) | 11.6*<br>(3.6,<br>63.83,<br>-14.07) | 0.13<br>(0.03,<br>0.81,<br>9.02)   | 0.80*<br>(0.14,<br>5.07,<br>3.90) | 0.81<br>(0.08,<br>5.00,<br>1.25)   | 79.1<br>(9.6,<br>490.95,<br>-2.71)  |

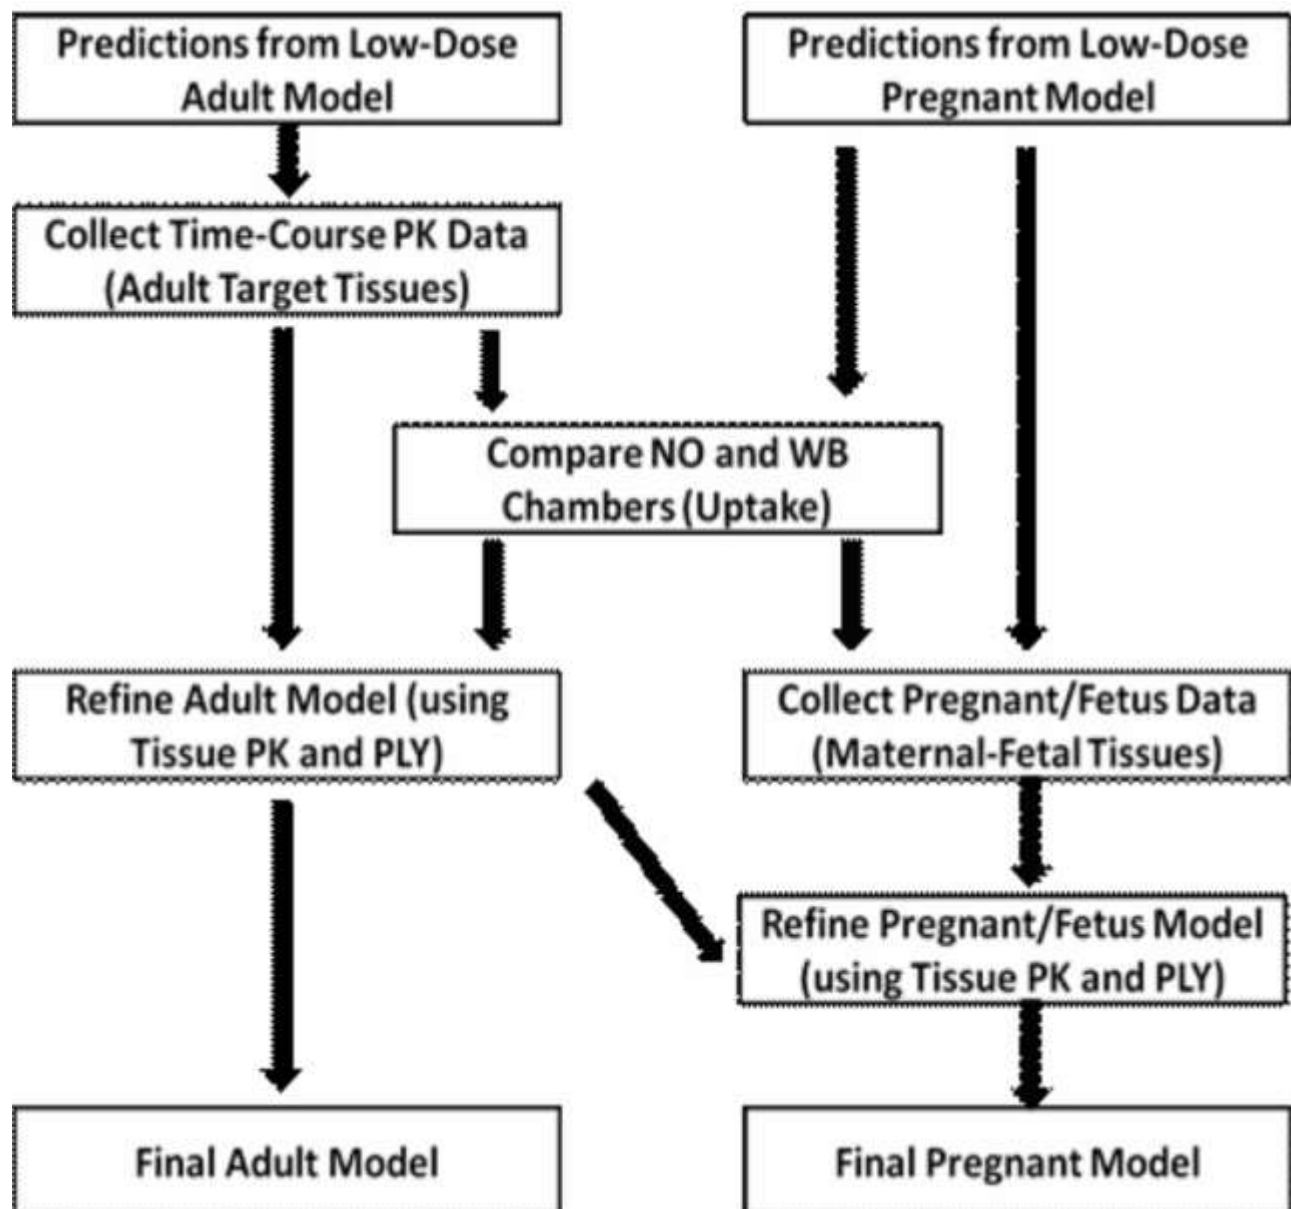

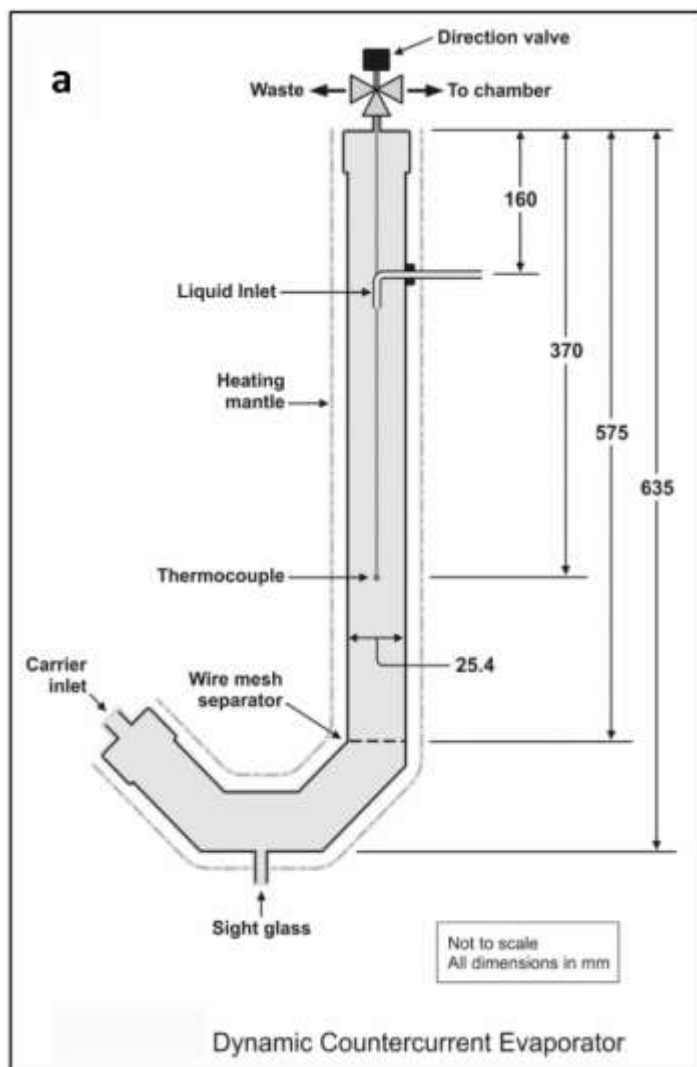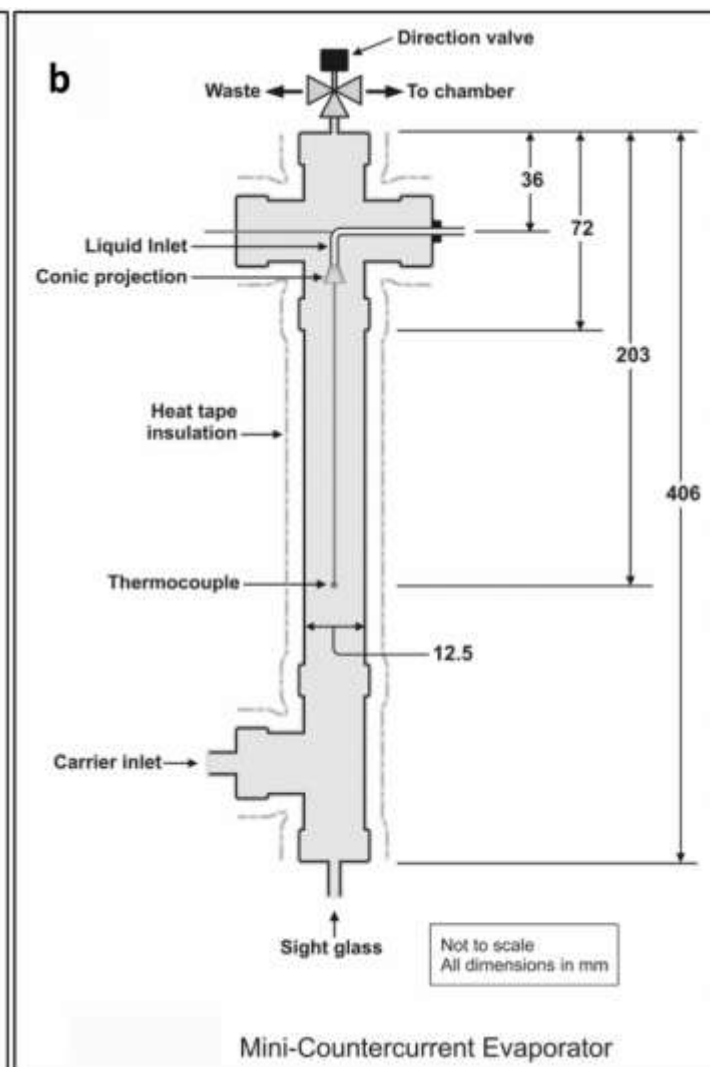

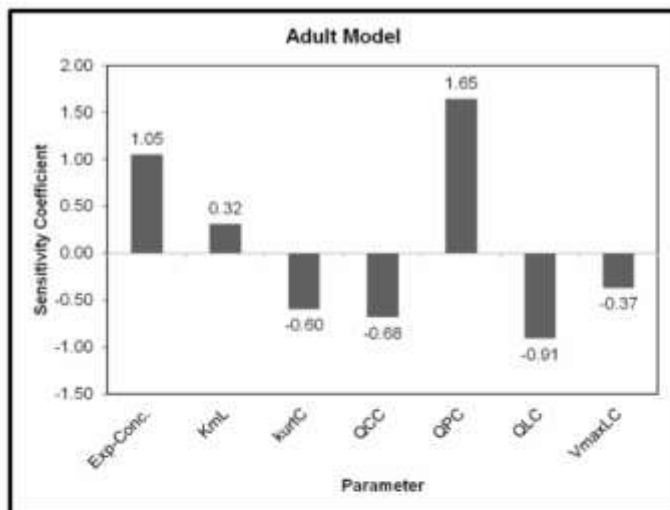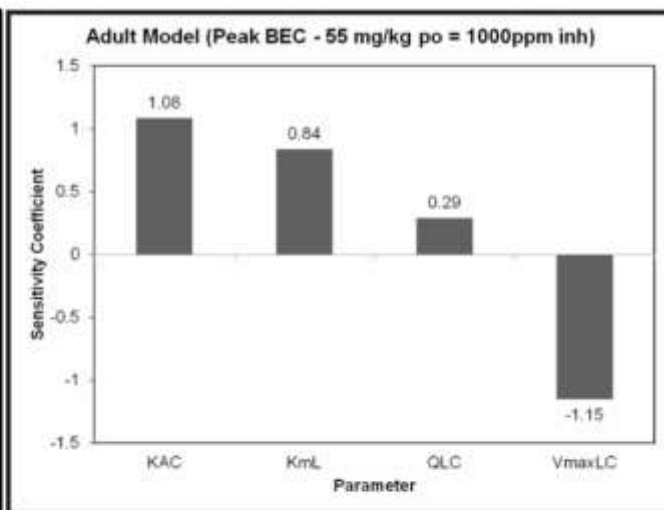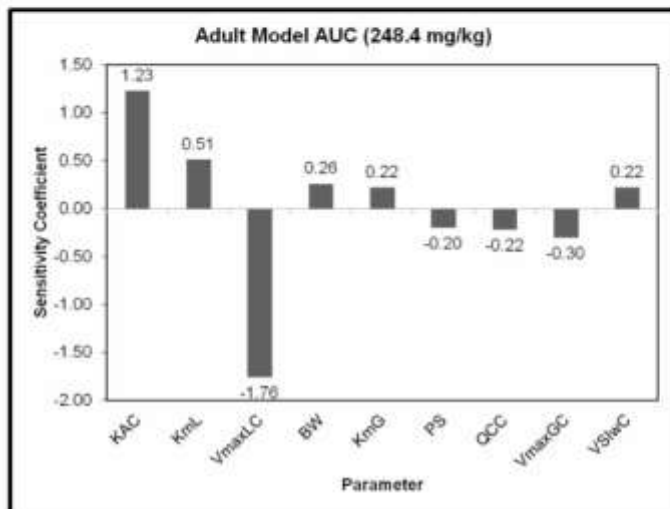

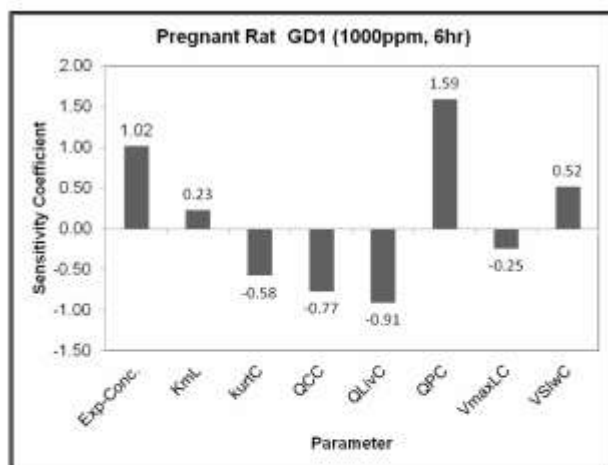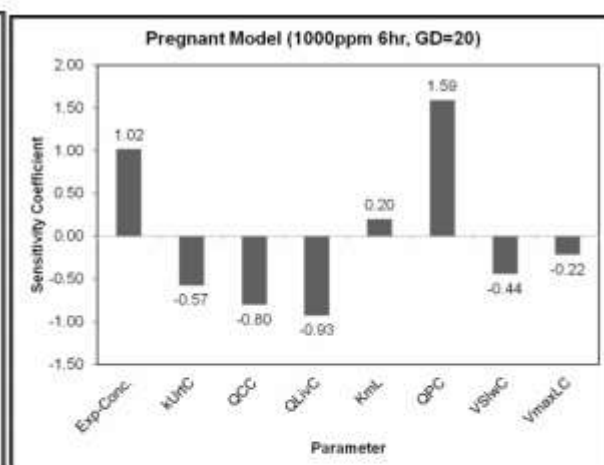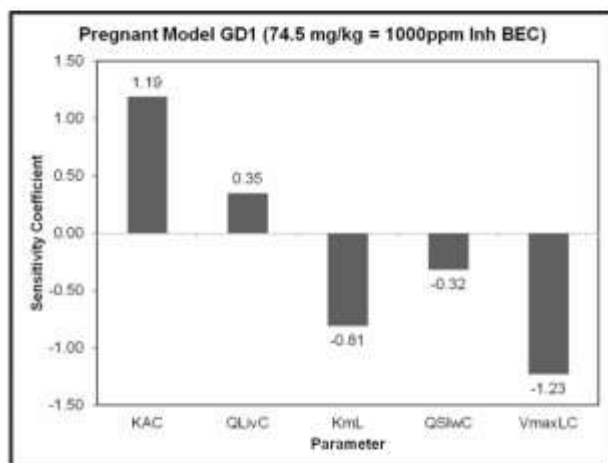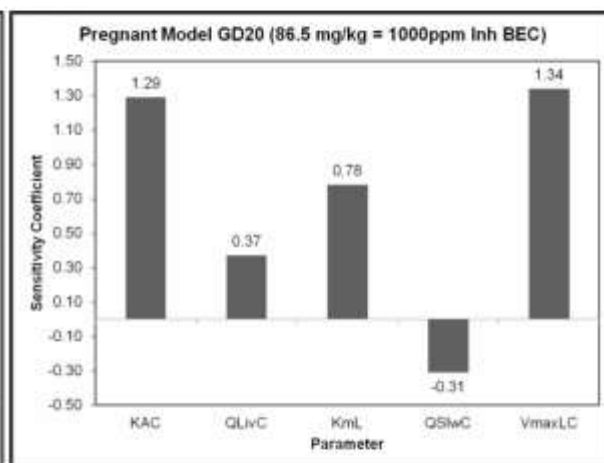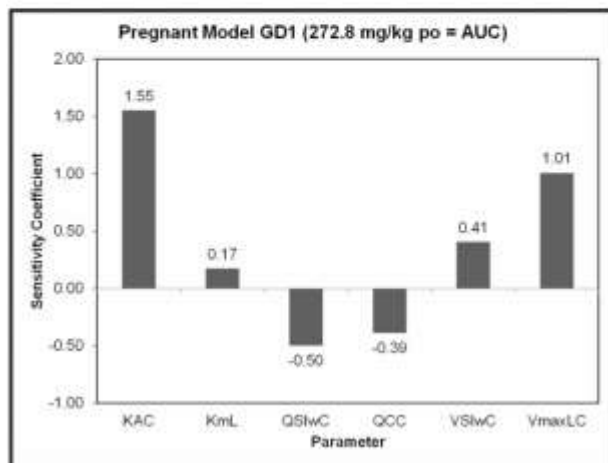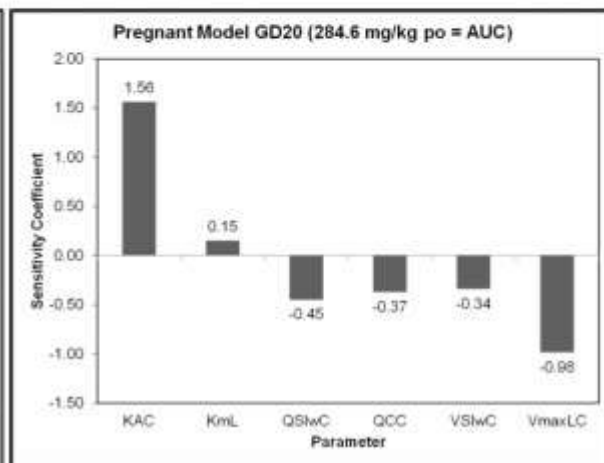

## Supplemental Figure Captions

Supplemental Figure 1. Flow diagram of studies performed to refine and evaluate adult and pregnant PBPK models.

Supplemental Figure 2. Evaporators. a.) Dynamic countercurrent evaporator used for Experiments 1 and 2. Measurements (mm), attachment points, and direction of flows are clearly indicated. b.) Mini-countercurrent evaporator used for Experiment 3.

Supplemental Figure 3a. Results of Sensitivity Analyses. a.) The PBPK model for non-pregnant rats was analyzed at 1,000 ppm (6hr), at the same achieved peak BEC as would be achieved by oral gavage (55 mg/kg), and at the same estimated AUC in blood as would be achieved by the aforementioned inhalation scenario; to evaluate route dependencies.

Supplemental Figure 3b.) Results of Sensitivity Analyses. The model for pregnant rats was analyzed at 1,000 ppm (6hr) on GD1 and GD20, at the same peak BEC produced by gavage on GD1 (74.5 mg/kg) and GD20 (86.5 mg/kg), as well as at the same AUCs from the inhalation scenario on GD1 (272.8 mg/kg) and GD20 (284.6 mg/kg); evaluating both route dependencies and the effect of gestational stage.
